# Supplementary material for: Ascovirus P64 Homologs: A Novel Family of Large Cationic Proteins That Condense Viral Genomic DNA for Encapsidation
Source: PubMed Central journal article supplement (PMC6163548; doi:10.3390/biology7030044), 2018-09-11
Supplement: biology-07-00044-s001.pdf [file biology-07-00044-s001.pdf]

## biology-348173\_Supplementary material/bideshi et al.

**Figure S1a: Amino acid sequences of Chilo iridescent virus 6 (CIV 6, IIV6)-178R ORF orthologs in classified (a) and unclassified (b) invertebrate iridescent viruses (IIV).**

Conserved cysteine residues in vs2C-ad motifs are typed and underlined in red and, whereas the complete motif is highlighted in yellow. Motifs that are repeated in tandem and rich in arginine-serine residues are highlighted in gray. The two 38-residues motifs that are separated by a conserved 14-residues linkers are typed in blue.

### a. Classified IIVs

>IIV3-100L ; pI = 10.17

MNDVHDCLVWVNDPYFHPISKRPIKYKGPTWRHYDKKCDLLGITGPKATKSPSRRTTRSP  
SPSRRTTRSSPSRRTTRSSPSRRTTRSPSPSGRRKQGPAVYCGNNALDEGLLDGSKVVG  
TRYQCLQKGVAVGLNNPVLHHSPNYQPIVDAKIYCGTGSKLPASKLRFGTPTCEMGKGYQ  
IGQNKRFQOSGLQQGPYIWEEDGWYKIIVPKN

>IIV6-378R ; pI = 10.61

MTSKCSKWHEQPLINPLTNRKIKKNGPTYKELERECGPPPRRSSPRRSPRRSPRRSSPR  
RSSPRRSPRRSSPRRSNQRIQLYCGNNARDEGLINGTKTLGTRYQCLKKGIGKGLNEPI  
LKYNNDYEPIENVRIYCGNGALPNNKDRFGTRDECLRKGFAVGQKQKYIRDGGIQRGPV  
VEENGWYKAYLPR

>IIV9-085R ; pI = 10.71

MANKCVMWHLQPLVNPVTNRKIKRGGLVYQKLEQECGPPPSGSRRSPSPSRRRSPSPSRR  
SSRRSPSPSRRSSRRSPSPSRRSLPPPQRQPELYCGNNSRERGLVDGTVLGTTRYQCLK  
GIGRGLKEPIFTWSDEYSPIEEVKVFCGNGDVLQNKDRFGTRDECLRKGFAVGQHOKYT  
RDGGIQRGPVVSSEDRGWYKVYLPSALGPPVLGIRN

>IIV22-ORF138R ; pI = 11.45

MTSNCAKWHSQPLVNPVTNRKIKVGGPKYKELERECGPPPSRRSPSPSRRRSPSPSRR  
SRRSPSPSRRRSPSPSRRRSPSPSRRRSPSPSRRRSPSPSRRRSPSPSRRPTEIYCGNNA  
RDEGLINGSKILGTRYQCLKKGIGRGLHEPILSYTNDYSPIEEVKIFCGNGNVLQNKDR  
FGTRDECLRKGFAVGQNKYTRDGDQIRTPVVSSEDKGWYKVYLPSALGAPILRR

>IIV22A-136R ; pI = 11.02

MTSNCAKWHSQPLVNPVTNRKIKVGGPKYKELERKCGPPPSRRSRRSPSPSRRRSPSP  
SRRSRRSPSPSRRRSPSPSSRRSPSPSRRPAEYICGNNARDEGLINGTKILGTRYQCL  
KKGIGRGLHEPILSYTNDYSPIEEVKIFCGNGNVLQNKDRFGTRDECLRKGFAVGQNK  
YTRDGDQIRTPVVSSEDKGWYKVYLPSALGAPILRR

>IIV25-136R ; pI = 11.37

MANKCAMWHLQPLVNPVTNRKIKRGGLVYQKLEQECGPPPSGSRRRSPSPSGRRSPSPSR  
RRSPSPSGRRSPSPSRRRSPSPSLRRSSRRSPSPSLRRSSRRSPSPSRRSLPPQRQPELY  
CGNNAREQLLNGTKVLGTTRYQCLKKGIGRGLNEPIFSYSDEYSPIEEVKIFCGNGNVVP  
QNKDRFGTRDECLRKGFAVGQHOKYTRDGGIQRGPVVSSEDRGWYKVYLPSALGPPVLGIR  
N

>IIV30-135R ; pI = 11.02

MTSNCAKWHSQPLVNPVTNRKIKVGGPKYKELEQKCGPPPSRQSRSPSPSRQSRSPSP  
SRQSRSPSPSRQSRSPSPSRRSRRSPSPSRQSRSPSPSRRPTEIYCGNNARDEGLIN  
GTKILGTRYQCLKKGIGRGLHEPILSYTNDYSPIEEVKIFCGNGNVLQNKDRFGTRDEC  
LRKGFAVGQNKYTRDGDQIRTPVVSSEDKGWYKVYLPSALGAPILRR

>IIV31-ORF130R ; pI = 10.43

MSKICKDWHEQPLVNPVTNRRIKKNGPTYRELEKKCGPPMTRRSPRRSSPRRSPRRSS

PRRSSPRSSPRSSPIRRNPETYCGNNAKDEGLTNGTKVLGNRFQCLRKGIGRGLNEPI  
FTYSEEYEPINIKVYCGNNANLPRDKDRFGTRDECLRKGFAVGQKQKYSRDGGVQKEPI  
ITQDRGWYKVVPRST

**b. Unclassified IIVs**

**>117R Cherax quadricarinatus iridovirus - 117R ; pI = 11.70**

MRVNENICQEFSNRPSVNPLTNRKIQKGKGVNELKKKCDSLGCRVQSRSSRSRSTRSS  
RRSSRRRTSPCRPCRRSSRSRSTRSRKRPARKTPPRTCPGACPRPMSPRRGASPRRRKPM  
GPFLPTNEIIPGMSPSRVRRIQKYTPKRPSTYYDARSRPFKPANDIIPGMSAAEVRI  
KKKYAQPAEESVYFDALDLD

**>Shrimp hemocyte iridescent virus isolate 20141215- missing ORF in the annotation of MF599468.1; pI = 11.70**

MRVNENICQEFSNRPSVNPLTNRKIQKGKGVNELKKKCDSLGCRVQSRSSRSRSTRSS  
RRSSRRRTSPCRPCRRSSRSRSTRSRKRPARKTPPRTCPGACPRPMSPRRGASPRRRKPM  
GPFLPTNEIIPGMSPSRVRRIQKYTPKRPSTYYDARSRPFKPANDIIPGMSAAEVRI  
KKKYAQPAEESVYFDALDLD

**Figure S1b. Amino acid sequences of SfAV1a-048R ORF orthologs**

Conserved cysteine residues in vs2C-ad motifs are typed and underlined in red, whereas the complete motif is highlighted in yellow. Motifs that are repeated in tandem and rich in arginine-serine residues are highlighted in gray.

**>DpTV (previously DpAV4)-ORF008 (one 2-cysteine adaptator and one remnant at the N-term ; pI = 9.29**

MALPKLSAAEFATMSAAWEANKMSDPENPTNPLSGRKIKRDGAVWKKVENYFNGATTPVK  
SPKGRSPKKEAKPRGRSPKKEAKPRGRSPKKEAKPRARSPKKAISGSSPRREA AAKPAPK  
AGAKPTEQDCAEFDRNPGVNPLTSRKIKIDGPVYKKLQKDCADIAPVAGPSGLAGPSGLA  
GPSGLGSGVAGSVSVSPDVVEIDNKVFVDS AANITRQEAFAKLADDRGYVVKLPETKC  
AFTAFGTYNMTSDEVRNIVIVEYATRCGATNRPFVFDAMIEDIRSGDGDCSRDTLLILLS  
VAFDCTIRVFYEEKTFELISEGSINRLVQLGLTLDGHYVVMIKTGEQQILSLPATVTC  
SPVVSQRAAPPTPVVSPEDVASMVEALESVRNKPRIYTLLQSEQALLKTIGLI

**>HvAV3e-ORF061 (three 2-cysteine adaptator) ; pI = 12.32**

MASRRKPSRLTAAQCETFIRNNKAVSPLTNKPIDVYGRAAAFRFRDCNLSPPPTKYTSTV  
CKKFLANKSVSPYSGRPIKRGAKLYNDLTKHCSGTRSSPARSPARRRRVIRSPSPNRRS  
SSPRRSASPQRRRASQPQRRRASQPQRRRASPDRSKPAKRTAANADTRPDLCATFSRNESIN  
PITGKKLIGTSPIRKAWHRMCAGTPNTRATKCMAFDKNDKKNPFTGRSIRPEQPAYRMVY  
SMCHGVPYRSPKRTRRSVRRSPSPRPYTATSVTRKYRRIKTPARSRSRSTRNSVGRRT  
TAVKSRKSPARRQSVARSRSRSPVRRKTRSRKSPARRQSVARSRSRSPARRQSV  
ARSRSRSPARRQSVARSRSRSPARRQSVAKSRSPARRQSVAMSRSTRSR  
QPMTAMRRSTSRARSRSRSPARRQSVARSRSRSPARRQSVAMSRSTRSR  
RINNSRSRSPARRQSVARSRSRSPARRQSVARSRSRSPARRQSVAMSRSTRSR  
NGFQPVVVAQNTTQSLLNIVKFQIREGNLKWLPNDQDVPTYYTSSRPFADRMKKN

**>HvAV3g-ORF066 (three 2-cysteine adaptator) ; pI = 12.33**

MASRRKPSRLTAAQCETFIRNNKAVSPLTNKPINVYGRAAAFRFRDCNLSPPPTKYTSTV  
CKKFLANKSVSPYSGRPIKRGAKLYNDLTKHCSGTRSSPARSPARRRRVIRSPSPNRRS  
SSPRRSASPQRRRASQPQRRRASQPQRRRASPDRSKPAKRTAANADTRPDLCATFSRNESIN

PITGKKLIGTSPIRKAWHRMCAGTPNTRA TKCMAFDKNDKKNPFTGRSIKPEQPAYRMVY  
SMCHGVPYRSPKRTRRSPVRRSPSPRPYTATSVTRKYRRIKTPARSRSRSNSVGRRT  
TAVKSRTKSPARRQSVARSRSRSKSPVRKTTRSRTKSPARRQSVARSRSRSKSPARRQSV  
ARSRSRSKSPARRQSVARSRSRSKSPARRQSVAKSRSRSKSPARRQSVAMSRRSRSRSR  
QPMTAMRRSTSRARSRSKSRKAMTASRSRSRSVSRYMNPVPTTTKKKRVSPVSRG  
RINNSRSRSASRARSGLSPYRGRVLLSPIPDGATPMSRSQLINIANNMNAELRHIVVS  
NGFQPVVVAQNTTQSLLNIVKFQIREGNLKWLPNDQDVPTYTSSRPFADRMKKN

>SfAV1a-ORF048 (four 2-cysteine adaptor) ; pI = 12.18

MASKRKPARNLAEQCETFKRNKQAVSPLTNCPIDKFGRTAARFRKECDIASPPTRYTSSV  
CKKFLANKTVSPYSGRPIKPGKKLYNDLEKHCSGRGTSPSRRSRSMSPRRRASPARRR  
ASPNRSKPAKRTAANADERPDYCTNFHRDESRNPLTGKKLVPTSPIRKAWHKMCSGTVQT  
RSTKCIAFDKNDKINPFTGRPINENNDTYRMIYSMCHGARYPKKRSPRRKNKSPARTVS  
FSPNRRSRSPSIGARRRPARPLRPSTSRSKTRSPSKSRSPSRRRSASKSRSPSRRRSASK  
SRSPSRRRSASKSRSPSRRRSASKSRSPSRRRSASKSRSPSMRRSMARRSPSQRRSTS  
VARRSPSQRRSTSVARRSPSQRRMSVARRSPSQRRMSVARRSPSQRRSTSVARRSPSQ  
RRSTSVARRSPSQRRMTTPSRSPSRQRTSSSRMSARRSPYSMSPYRGRVLMTPMPE  
DAEPLSQDQLMRIASRMNVAQLRHVVTRNGFQVPDVAFNTNSSQLLNLVRYHIREGNIKW  
LPANDQNVPNYRTTARPFMDRMKKN

>TnAV2c-ORF141 (four 2-cysteine adaptor) ; pI = 12.28

MPQATTPRRRRNAQNMNNSAERVTRTQCEDFISSLQKKNPITNRKIDVFGSTAASLRNC  
SMKHNYEFTAPRRSKANMKCTEFLSNPRENPITGRKLAANKPTYKKFKVVCGSPGRISPS  
PRRRVTQTRSPSPRRRATQSRSPSPRRRVQTRSPSPSRRRRSRSRSNSVEFSTNCTKFI  
NNDKINPKTNKNIKYGPTYKKIVTKCKQNLNESPKLPQQMCNEFHQNAKKKNPITGRKI  
AVGSVVQRRIVSQCGGFRSPSRSRSASRRRSPSPARSRSASRRRSPSPARSRSRS  
ASRRRSPSPARSRSASRRRSPSPARSKRSQTRSRSTSRRSASPARKSRSQTKSR  
SRSPSPARSRSRSTSRRSASPARKSRSQTKSRSPSPARSRSRSTSRRSASPARKSR  
SKTRSRRSASKRRSASPARKSRSQTRSRSPSPARKSRSQTRSRSPSSSSSSSR  
SRSTSSSRFRSLEQKSLPELRKYAIDLKSLTMGHVYSLDKYSLRLIKSKEGSTVSKSS  
RSRSCSSASSKTNVGTGRRGITDYYSMTVDQLRSLASAKKLGTEEILRNLAQALRVL  
LTSKTPIRLTPQSPNRTFRLQTPQPGTSDPLVSKNFGVFKQNRLL

IIV6-ORF232R (two 2-cysteine adaptor) ; pI = 10.41

MNNNQCMRKKLDELNRNIARSYNISITGKKKQQLCDEIIDYQKNNPPRRSPRRSPRR  
ISPECEQWLANKGINPRTGKAIKIGGPTYKKLEMECKEASPKIPSPVRQSPVHSPVRS  
VRQSPVRFVEKTKGALNKMKKDQLIDFAQSLGLNPGKLLKPALVDLIFVNQKPPRRSPS  
PRRSPSPRRSPSPRRSPSPRVFVEKTKGALNKMKKDQLIDLAQSLGLNPGKLLKPALVD  
LIFVNQKPVPIRASSSRSSRSTRSSSTKPSRRSSSRSSRSSSRSSRSSSRSSR  
SSRSSRSTSRSLSKRSIRNISTVGDLEDLVASNLPPIAIPESLSRSLSPSRTDFHEAE  
IELGSDFDLNNLPENRIAEKQLNVLAKQNGFRMINVPLDGNCMFSVIGRAFNTSSSVIR  
QHTVDYLRRCKGSFDHIPANIDDPTINWNDYIDRLEEDACWGDNTALFAASLALNFQAH  
LQVAGGDEGSWIRFGVNETNMGRIVNMGYLDNFHYIALEPFSGRLDILSIPSTHSCPPP  
EISNRRDEEIRRDEEVEDEVIGERIVREAEVIERELRQEEELTSIVSTKRSRPSIPPKI  
STEHRRTPKLRPSVPRPSSIRQSQPNVAALARLETLTKIKDIIDALQRPLENKLSTLTNT  
EKAIMQCIGVA

>IIV31-ORF015R (one 2-cysteine adaptor) ; pI = 9.40

MNRNQCMKKKDELVEIALSMNISVAGKTKKLCNEILSMQAVPAAPVSPDIASGSDCE

EWIKNPGVNPKTGRAIKIGGPVYKLEKECGEPEPEEEEEAVVTAIPAIPLYTKGVLNKM  
KKNQLEIALSLSINPDKKLPKLVVEILIQQTRAVQVPRSPKLVVEILIQQTRAVQVP  
RSPSPRRSPRRSPVYTKGALNKMKKQDLINLSKTLKLETNGLKQDLIQRILNSYIV  
EIEEIAAPRSPSPRRSPRRSLSPRRSPRRSPSRQSTSVELEISARDVRKISNVSDL  
NKLVASIHSPVIRRTSESSFFKNLRRDYSDGKIPRETEFKDLEILAQAAGFKMINVPLDG  
ACMFSVIARSFGTTGANIRKIVVDYLRKCEESFAYLFEDYTIPERYLERLEEDDCWGDEL  
TLFAATKALNFQAKVLNQHNQRQWVDVGS DAGRIIYLGYYQFHVVALEKLEKLEGEDET  
LILPTSPICPPPMGVSSRSPRIPSRFSPVPPSIRASVIKSLQPSIPRSLTPAFTPQPTR  
LMTLTNIGAIIRELQIPLNKLTTLNDTNTAIMKCVGLA

>Cherax quadricarinatus iridovirus - O57R ; pI = 9.72

MEFNKRKYKDLQIVKSGEILTVPARKISSSPVCIQWFNNPNVNPRTNRKIKTFGPTYRAL  
TDECTRKRVRSDPREQRKPPRVTPRVISQPTS NKSWFDIRLRTGIEINNMLREMDVKQWN  
LCMSGTKSSKFQKNFTSIEKIGLGSFGQIYKARLSDGNSVVKAEAYLKLPEKRLAEKYTK  
KGEKWEDVDVKSYPRENKILELVNQLLS RKCPNFVYVYVNI AFCDGCVIKNYYQRRSTRG  
ACYITFMEPADDNLRNTELRTYDQQLSVLYQLLISVHAIHKYYTIWHRDIKSTNIFIKKI  
KPGGYFKYVINGKNYFVKNTGIVAYLADFGVSEIMSPLYSSGRYYGTRNGEVAKMDRKIK  
GSNLYWKPIYKGREIRYWYDETSSKNLDYDVIKTRNKIATKNPIKSSRPIDLNDNHKF  
PPFEFGSDIQDVVNVFLGGKQQEQPGNHSRMPYLNSKIRSMLELAKANTTIVNSIYGTVK  
YILADEMLNALYIEPKVVDKIIDTFEMY

> Shrimp hemocyte iridescent virus isolate 20141215 - 94L ; pI = 9.72

MEFNKRKYKDLQIVKSGEILTVPARKISSSPVCIQWFNNPNVNPRTNRKIKTFGPTYRAL  
TDECTRKRVRSDPREQRKPPRVTPRVISQPTS NKSWFDIRLRTGIEINNMLREMDVKQWN  
LCMSGTKSSKFQKNFTSIEKIGLGSFGQIYKARLSDGNSVVKAEAYLKLPEKRLAEKYTK  
KGEKWEDVDVKSYPRENKILELVNQLLS RKCPNFVYVYVNI AFCDGCVIKNYYQRRSTRG  
ACYITFMEPADDNLRNTELRTYDQQLSVLYQLLISVHAIHKYYTIWHRDIKSTNIFIKKI  
KPGGYFKYVINGKNYFVKNTGIVAYLADFGVSEIMSPLYSSGRYYGTRNGEVAKMDRKIK  
GSNLYWKPIYKGREIRYWYDETSSKNLDYDVIKTRNKIATKNPIKSSRPIDLNDNHKF  
PPFEFGSDIQDVVNVFLGGKQQEQPGNHSRMPYLNSKIRSMLELAKANTTIVNSIYGTVK  
YILADEMLNALYIEPKVVDKIIDTFEMY

>EHNV-ORF089 (Epizootic haematopoietic necrosis virus ; ACO25279.1) ; pI = 9.42.

Orthologs in other ranavirus are found in the European catfish virus (YP\_006347710.1), the Tiger frog virus (YP\_031597.1), the Common midwife toad ranavirus (AFA44994.1), the Soft-shelled turtle iridovirus (ACF42240.1), the Rana grylio iridovirus (AFG73063.1), the Ambystoma tigrinum virus (YP\_003855.1), the Grouper iridovirus (AAV91044.1), and the Singapore grouper iridovirus (YP\_164134.1).

MATNYCDEFERNPTRNPRTGRTIKRGGPVFRALERECS DGAARVFPAAAVRGAAAARAVS  
PRVAVASPCPEFARDPTRNPRTGRPIKRGGPVFRALERE CADYGGASPRRVSPARAFPNR  
RASPARRQSPAEEAEA SPCPDFARDPTRNPRTGRTIKRGGPTYRALEAE CADYGRLSPIR  
SPWSDWSSTGSSPFRSHMRKSPAISKSPARKSPARKSLARYAEYLTSDETEVDYD  
AMNVIRSKVGP GVCERFAADPTRNPVTGSPLSRNDPLYTDLMEI CKGYPDTPLTKSLTG  
EGTDD DTCEAFCRDPTRNPVTGQKMRRNGIEYQMF AEED CSGISRPSGVSR TSGPSGTS  
GTSASSRPPNSFEASGVARVPGTPSVSRDEPRWMSISTRHDYDESNPMSVAFRLRHVKD  
IRKFLRTVKPGRSGFCATDNGGWLGSAAVSDK VIGQGSWGSVHMVKFRDFPKEFVVKEAV  
LMSVSEKRRYKPTVVWDEWAAGSMPDEVVVNNMVTEIAATGMTFPVPLTAGAGACDSCNP  
QLLEKAANVTKCYLQAMEAAADFLDRVLTMSPDQAASALAQILLGLQSLQTTLGIMHND

IKAHNILVKRVPPGGYWKVTDSENGQVFYIPNEGILCMLADYGVVRLVKPAVGMMDTLYGT  
 RNARFVPRDVGRWGKGAGTEYVVTPIRSKISVIVRGGRFVGVPEPNKAVRYWKNTDTSKVG  
 DVITTNVNFYMGYDIEPDMQVQLDDTNSFPIWESRGDVADCVRFTVGGKRASQPGFHGLF  
 YKKTGSAWEKAAETVAKQNPLFSGFALDGSGLKYIRAATACAYIFPGMAVPRPGEREIES  
 FTM

**Figure S1c. Proteins having the potential to function like SfAV1a P64 protein in some invertebrate iridoviruses (IIV) and members of Lymphocystivirus and Megalocytivirus**

Our results provided evidence that the SfAV-1a P64 orthologs found in AV, in some invertebrate iridoviruses and in *ranaviruses* compose a family of large DNA condensing proteins with distinct domains not present in other protein families with a similar function. Its absence in some invertebrate iridoviruses (IIV3, IIV20, IIV22A, IIV25 and IIV30) (Delhon et al., 2006; Piégu et al., 2013 ) and in vertebrate iridoviruses of the *Lymphocystivirus* and *Megalocytivirus* genera raises questions about which candidate proteins could potentially condense viral DNA for encapsidation in virion. Data presented here, and more specifically those obtained with the rN-term and rC-term domains of SfAV1a P64, provide evidence that the main sequence determinants to bind viral DNA and to assemble DNA-protein aggregates are not the vs2C-ad motifs, but results from the properties of the motifs repeated in tandem and rich in arginine and serine residues that occur both in the N-terminal and the C-terminal region of this protein. In agreement with this conclusion, vs2C-ad motifs are known to be found fused to OTU/A20-like peptidases and S/T protein kinases, proteins that have no DNA binding activities and in which these motifs presumably play a role as adaptors that connect the kinases and OTU/A20 peptidases to their specific targets (Iyer et al. 2006). In SfAV1a P64 and its relatives, the vs2C-ad motifs could therefore be involved in interactions of other virion proteins, including the major capsid protein, with the condensed viral DNA-P64 complex.

In invertebrate iridoviruses, all viruses encoded a protein related to that encoded by the CIV IIV6-178R ORF. This protein met the motif requirements to have a role similar to that of SfAV-1a P64 in condensing viral DNA for encapsidation. To identify candidate proteins that could function in condensing viral DNA for encapsidation in iridoviruses that do not encode a SfAV-1a P64 relative, our searches were focussed on proteins containing vs2C-ad motifs and short tandem repeats rich in arginine and serine residues, with a pI above 9, absent together in AV, IIV3 and *Ranavirus*, and present in all members of the genera *Lymphocystivirus* or *Megalocytivirus*. Among *Lymphocystivirus*, no candidates were found in the Lymphocytis disease virus (Tidona and Arai, 1997). However, we have found in *Megalocytivirus*, a gene family occurring in all virus members and which possesses all criteria, including the difficulty of alignments encountered with the SfAV-1a P64 relatives. This family corresponded to relatives of the Turbot reddish body iridovirus ORF52L.

**ORF52L in the Turbot reddish body iridovirus**

MPSTTSKCNQLRQNKYTVNPVSNRNIAPRGDTANTLRRICEQPRLCAEYKRSPRYNPWT  
 DRRLAPGSPKHNLISGMCGGYAPNWSRELVRTNRRAHNTNSRLQREWLETVNRPGAHVP  
 RLNDACALYDDPTVNPFTDGPLRRYSPIDDLRYRNCEPAETKRMQCRAFEANPDVNP  
 TGRKISPTGPIASSMRRRCMN YDAVPISRSEAGPRGGRSIGVNTPFSAANNSNISDTQLS  
 GSRRSIAVNTPSSSHAHSLLSISSSSSDSPAGPSGVSVGVGPTPGIVIKRSPVRERAE  
 IIQNYTASRGQQ

**ORF055L in the Infectious spleen and kidney necrosis virus**

MPSTTSKCNQLRNNRYTVNPVSNRAIAPRGDTANTLRRICEQPRLCAEYKRSPRYNPWT

DRTLAPGSPKHNLISGM<sup>C</sup>GGYAPNWSRERVRTNRKAHKTNSRLQREWLETVNRPGAHVP  
RRDDACALYDDPTVNPFTDEPLRRYSPIDDLRYNCESAEIKRRQ<sup>C</sup>RAFEENPDVNP  
TGRRIPTGPIASSMRRR<sup>C</sup>MN<sup>Y</sup>NAVPIRSEVGRGGRSIGVNTPFSA<sup>N</sup>NSNISDTQSS  
GSHRSIAVNT<sup>P</sup>SS<sup>H</sup>SAHSL<sup>L</sup>GTISS<sup>S</sup>SS<sup>S</sup>DN<sup>S</sup>SPAGPSGVSVGVGRTPVALKRSPVRERA  
EIIENY<sup>T</sup>ASRGQ<sup>Q</sup>

**ORF 106R in the Red seabream iridovirus**

MPSTT<sup>S</sup>K<sup>C</sup>Q<sup>L</sup>RRNRYTVNPVSNRSIAPRGDTANTLRR<sup>I</sup>CEQ<sup>P</sup>RL<sup>C</sup>AEYKRSPRYNPWT  
DRTLPGSPKHNLISGM<sup>C</sup>GGYAPDWSRERVRTNRKAQNTNSRLQREWLETVNRPGAHVP  
RRDDA<sup>C</sup>ALYDDPTVNPFTDGPLRRYSPIDDLRYNCEPAETK<sup>R</sup>IQ<sup>C</sup>RAFEENPDVNP  
TGRRIPTGPIASSMRRR<sup>C</sup>MN<sup>Y</sup>DAMPISRSEVGRGGRSVGVNTPFSA<sup>N</sup>NSNISDTQFS  
GSRRSIAVNT<sup>P</sup>SS<sup>G</sup>SHSAHSL<sup>L</sup>GSISS<sup>S</sup>SGSDNSSTAGPSGVSVGVGPTPGIVIKRSP  
VRERA<sup>E</sup>IIQNYTASRGQ<sup>Q</sup>

**ORF52L in the Turbot reddish body iridovirus**

MPSTT<sup>S</sup>K<sup>C</sup>NQLRQNKYTVNPVSNRNIAPRGDTANTLRR<sup>I</sup>CEQ<sup>P</sup>RL<sup>C</sup>AEYKRSPRYNPWT  
DRRLAPGSPKHNLISGM<sup>C</sup>GGYAPNWSRELVRTNRRAHNTNSRLQREWLETVNRPGAHVP  
RLNDA<sup>C</sup>ALYDDPTVNPFTDGPLRRYSPIDDLRYN<sup>C</sup>EPAETK<sup>R</sup>MQ<sup>C</sup>RAFEANPDVNP  
TGRKISPTGPIASSMRRR<sup>C</sup>MN<sup>Y</sup>D<sup>A</sup>VPIRSEAGPRGGRSIGVNTPFSA<sup>N</sup>NSNISDTQLS  
GSRRSIAVNT<sup>P</sup>SS<sup>H</sup>SAHSL<sup>L</sup>GSISS<sup>S</sup>SS<sup>S</sup>DPAGPSGVSVGVGPTPGIVIKRSPVRERA<sup>E</sup>  
IIQNYTASRGQ<sup>Q</sup>

**References: Supplemental Figure S1c.**

- Delhon, G., Tulman, E. R., Afonso, C. L., Lu, Z., Becnel, J. J., Moser, B. A., Kutish, G. F. Rock, D. L. 2006. Genome of invertebrate iridescent virus type 3 (mosquito iridescens virus). *J. Virol.* **80**, 8439-8449.
- Iyer, L. M., Balaji, S., Koonin, E. V., Aravind, L. 2006. Evolutionary genomics of nucleo-cytoplasmic viruses. *Virus Res.* **111**, 156-184.
- Piégu, B., Guizard, S., Spears, T., Cruaud, C., Couloux, A., Bideshi, D. K., Federici, B. A. Bigot, Y. 2013. Complete genome sequence of invertebrate iridescent virus 22 isolated from a blackfly larva. *J. Gen. Virol.* **94**, 2112-2116.
- Tidona, C. A., Darai, G. 1997. The complete DNA sequence of lymphocystis disease virus. *Virology.* **230**, 207-216.
